# Supplementary material for: Droplet-driven transports on superhydrophobic-patterned surface microfluidics
Source: Royal Society of Chemistry journal article supplement (doi:10.1039/c1lc20390h), 2011-01-01

## Droplet-Driven Transports on Superhydrophobic-patterned Surface Microfluidics

Siyuan Xing, Ryan S. Harake, and Tingrui Pan\*

Micro-Nano Innovations (MiNI) Laboratory, Department of Biomedical Engineering,  
University of California, Davis, USA

**Figure S1.** Illustration of the two-step procedure of laser micromachining to create superhydrophobic PDMS-based micropatterns: a) spin- or cast-coating of a thin layer of PDMS pre-polymer; b) laser engraving of nanofibrous structures on PDMS matrix; and c) laser ablation of the PDMS layer for microfluidic network formation.

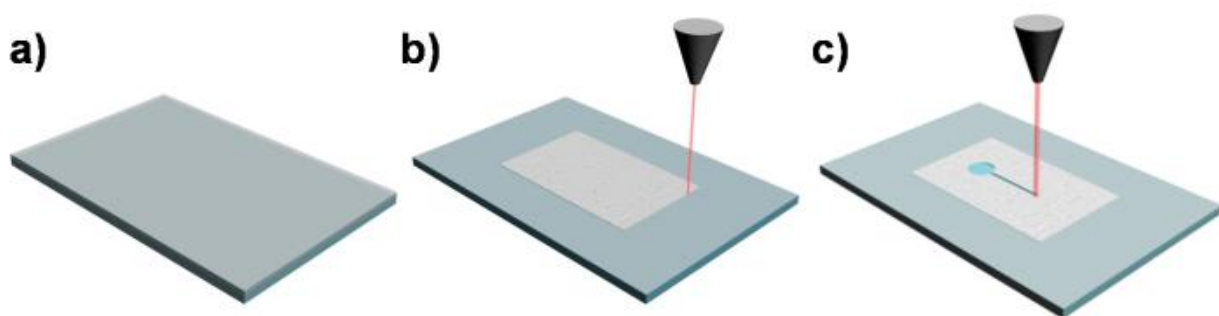

**Figure S2.** Summary of the contact angle ( $\theta_c$ ) measurements over different combined configurations of laser powers and speeds for optimized superhydrophobicity (scale bar is 2.5 $\mu$ m).

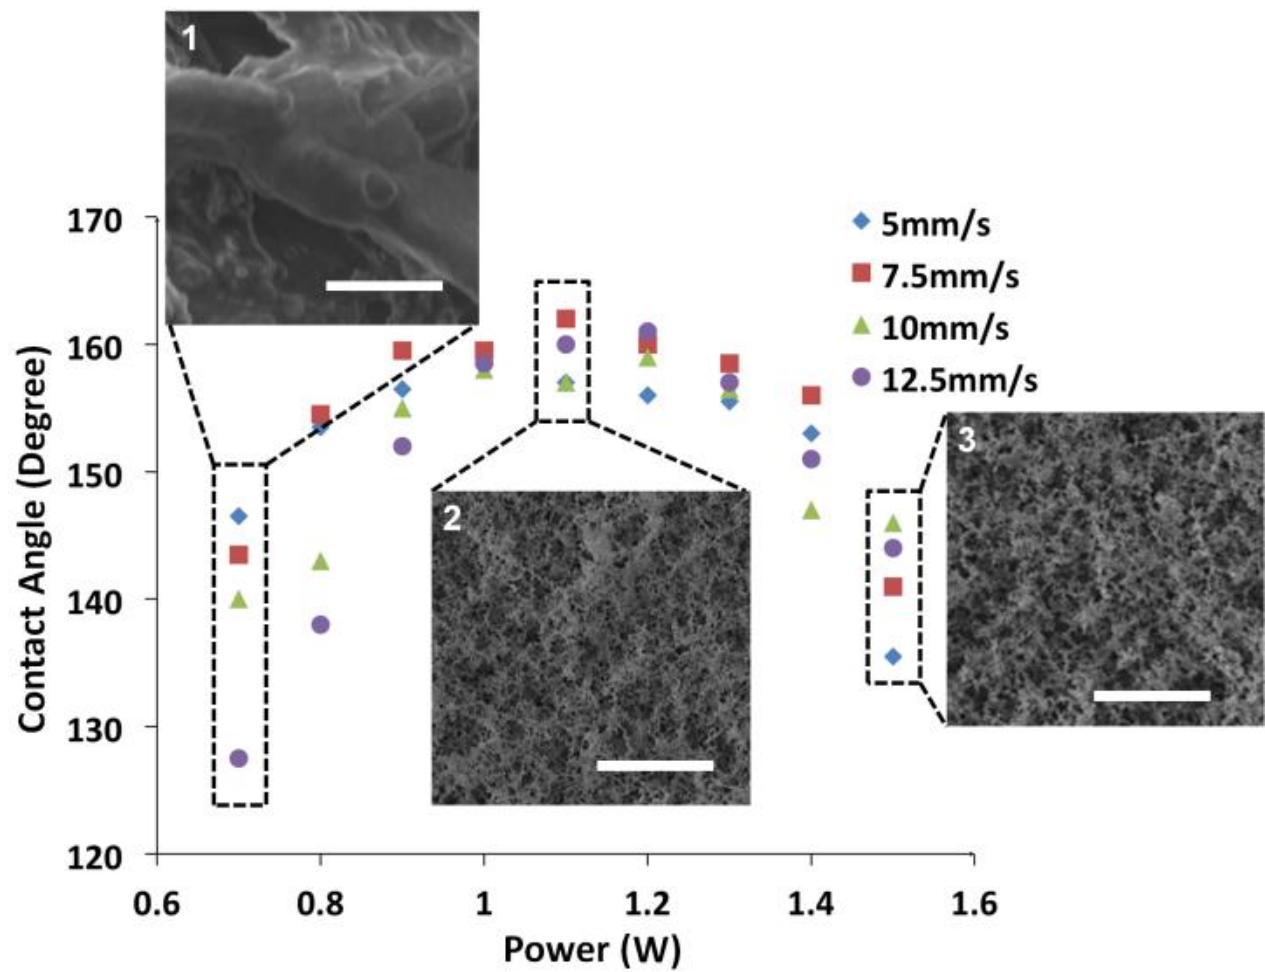

Supplement: c1lc20390h.pdf [file c1lc20390h.pdf]
